# Supplementary material for: Trends in the Adoption of Robotic Surgery for Common Surgical Procedures
Source: PubMed Central journal article supplement (PMC6991252; doi:10.1001/jamanetworkopen.2019.18911), 2020-01-10
Supplement: jamanetwopen-3-e1918911-s001.pdf [file jamanetwopen-3-e1918911-s001.pdf]

## Supplementary Online Content

Sheetz KH, Claflin J, Dimick JB. Trends in the adoption of robotic surgery for common surgical procedures. *JAMA Netw Open*. 2020;3(1):e1918911.  
doi:10.1001/jamanetworkopen.2019.18911

**eTable 1.** Trends in the Use of Open Surgery for Specific Procedures, 2012-2018

**eTable 2.** Trends in the Use of Laparoscopic Surgery for Specific Procedures, 2012-2018

**eFigure.** Proportion of Hospitals and Surgeons Performing Any Robotic General Surgery in Michigan, 2012-2018

This supplementary material has been provided by the authors to give readers additional information about their work.

**eTable 1.** Trends in the Use of Open Surgery for Specific Procedures, 2012-2018

| Procedure                        | Proportional Use, % |           | Fold Difference | Annual Trend, % per Year (95% CI) |
|----------------------------------|---------------------|-----------|-----------------|-----------------------------------|
|                                  | Year 2012           | Year 2018 |                 |                                   |
| <b>All</b>                       | 42.4                | 32.4      | 0.8             | -1.5 (-1.8 to -1.2)               |
| <b>Inguinal hernia repair</b>    | 98.2                | 53.1      | 0.5             | -8.1 (-8.4 to -7.7)               |
| <b>Ventral hernia repair</b>     | 83.4                | 54.1      | 0.6             | -3.8 (-4.1 to -3.6)               |
| <b>Colectomy</b>                 | 77.0                | 45.7      | 0.6             | -4.1 (-4.4 to -3.8)               |
| <b>Reflux surgery</b>            | 40.2                | 5.2       | 0.1             | -3.6 (-4.0 to -3.3)               |
| <b>Proctectomy</b>               | 87.9                | 63.8      | 0.7             | -3.3 (-4.4 to -2.3)               |
| <b>Cholecystectomy</b>           | 2.5                 | 1.3       | 0.5             | -3.6 (-3.7 to -3.5)               |
| <b>Complex cancer resections</b> | 86.1                | 72.7      | 0.8             | -1.8 (-2.4 to -1.1)               |

**eTable 2.** Trends in the Use of Laparoscopic Surgery for Specific Procedures, 2012-2018

| Procedure                        | Proportional Use, % |           | Fold Difference | Annual Trend, % per Year (95% CI) |
|----------------------------------|---------------------|-----------|-----------------|-----------------------------------|
|                                  | Year 2012           | Year 2018 |                 |                                   |
| <b>All</b>                       | 55.8                | 52.6      | 0.9             | -0.5 (-0.7 to -0.3)               |
| <b>Inguinal hernia repair</b>    | 0.8                 | 18.0      | 22.5            | 2.6 (2.3 to 2.9)                  |
| <b>Ventral hernia repair</b>     | 16.6                | 23.5      | 1.4             | 0.2 (-0.1 to 0.4)                 |
| <b>Colectomy</b>                 | 20.5                | 38.0      | 1.9             | 1.9 (1.6 to 2.2)                  |
| <b>Reflux surgery</b>            | 54.4                | 68.8      | 1.3             | 0.9 (0.3 to 1.4)                  |
| <b>Proctectomy</b>               | 9.0                 | 9.5       | 1.1             | -0.6 (-1.4 to 0.2)                |
| <b>Cholecystectomy</b>           | 91.2                | 92.1      | 1.0             | 3.2 (3.0 to 3.4)                  |
| <b>Complex cancer resections</b> | 11.8                | 23.3      | 2.0             | 1.4 (0.8 to 2.0)                  |

**eFigure.** Proportion of Hospitals and Surgeons Performing Any Robotic General Surgery in Michigan, 2012-2018

**Appendix Figure 1**

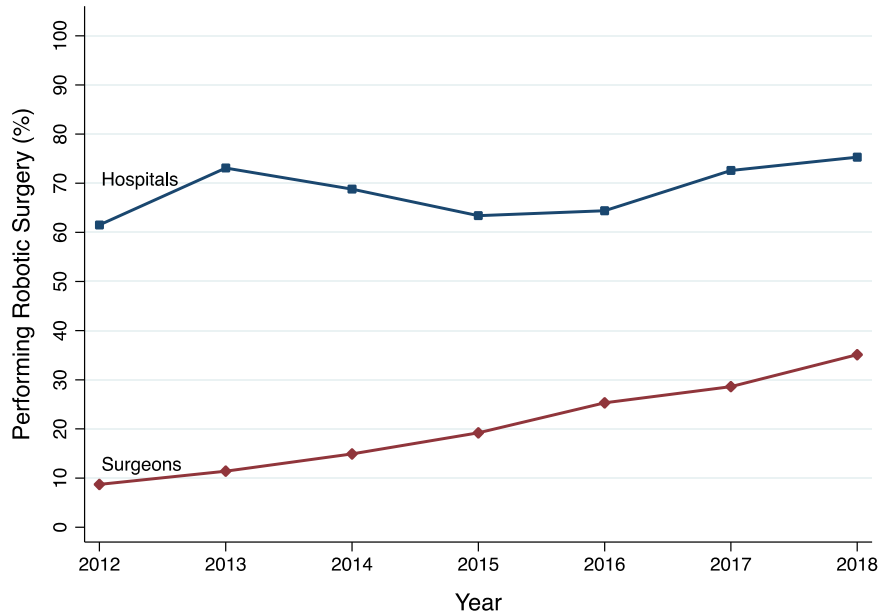

|                         |     |     |     |     |     |     |     |
|-------------------------|-----|-----|-----|-----|-----|-----|-----|
| <u>No. of Hospitals</u> | 52  | 52  | 64  | 71  | 73  | 73  | 73  |
| <u>No. of Surgeons</u>  | 759 | 841 | 871 | 902 | 974 | 972 | 828 |
